# Supplementary material for: Low temperature hydrogenation of pyrolytic lignin over Ru/TiO2: 2D HSQC and 13C NMR study of reactants and products
Source: Royal Society of Chemistry journal article supplement (doi:10.1039/c5gc02286j), 2015-10-15
Supplement: c5gc02286j1.pdf [file c5gc02286j1.pdf]

## Supplementary information

### Quantitative $^{13}\text{C}$ NMR spectra of pyrolytic lignin, LMW fraction, HMW fraction, and hydrogenated pyrolytic lignin after three steps of hydrogenation.

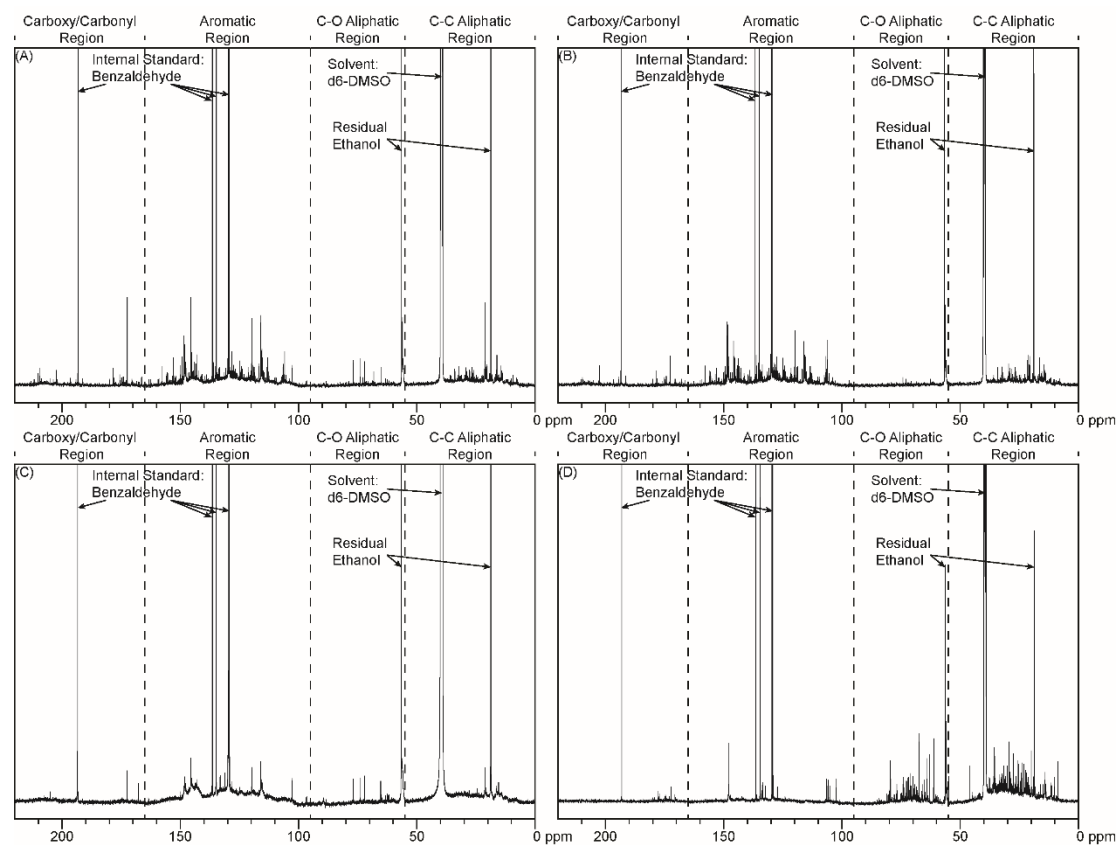

Figure S1. Quantitative  $^{13}\text{C}$  NMR of pyrolytic lignin (A), LMW fraction (B), HMW fraction (C), and hydrogenated pyrolytic lignin (D) three step hydrogenated pyrolytic lignin. Highlights the carboxyl/carbonyl, aromatic, C-O aliphatic, and C-C aliphatic regions as well as the internal standard (benzaldehyde), residual ethanol, and the solvent ( $\text{d}_6\text{-DMSO}$ ).

## Rotary evaporation results of pyrolytic lignin, LMW fraction, and HMW fraction in ethanol (10 wt.%)

Table S1. Rotary evaporation results of pyrolytic lignin, the LMW fraction, and the HMW fraction in ethanol (10 wt.%)

(Rotary evaporation conditions: 170 mbar of pressure, 55 °C, 5 g of substrates, 1 h).

| Fraction         | Mass yield (wt. %)            |                                   | Carbon yield (Carbon %)       |                                   |
|------------------|-------------------------------|-----------------------------------|-------------------------------|-----------------------------------|
|                  | Volatile liquids <sup>a</sup> | Non-volatile liquids <sup>b</sup> | Volatile liquids <sup>a</sup> | Non-volatile liquids <sup>b</sup> |
| Pyrolytic lignin | 24.2                          | 75.9                              | 27.3                          | 72.8                              |
| LMW              | N/A                           | 107.8                             | 3.1                           | 96.9                              |
| HMW              | 29.9                          | 70.1                              | 26.3                          | 73.7                              |

<sup>a</sup> Volatile liquids: distillates after rotor evaporation of liquid product at 55 °C and 170 mbar for 1h.

<sup>b</sup> Non-volatile liquids: distillate residue after rotor evaporation of liquid product at 55 °C and 170 mbar for 1 h.

## Temperature and reaction pressure as a function of reaction time

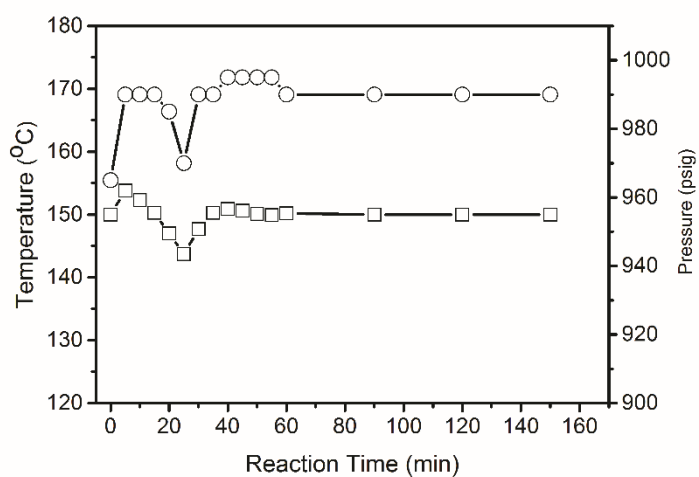

Figure S2. Temperature (□) and pressure (○) as a function of reaction time during the hydrogenation of pyrolytic lignin. Reaction condition: reaction temperature: 150 °C, heating rate: 10 °C/min, 2.5 h, initial hydrogen pressure: 725 psig, 10 g pyrolytic lignin in ethanol (10 wt.%), 1.5 g Ru/TiO<sub>2</sub>.
